# Supplementary material for: Angulin-1 (LSR) Affects Paracellular Water Transport, However Only in Tight Epithelial Cells
Source: MDPI journal article supplement (doi:10.3390/ijms22157827), 2021-07-22
Supplement: s1 [file s1]

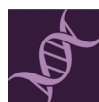

## Supplementary Materials

### Part 1. Numerical data from angulin-1 knockout clones in MDCK C7 and HT-29/B6 cells.

**Table S1.** Characteristics of MDCK C7 angulin-1 knockout clones and the corresponding controls. Two angulin-1 knockout clones and their corresponding controls were analyzed in this study (Control 14, Control 18, KO 18 and KO 36). Data of angulin-1 expression have been obtained by densitometric analysis of Western blots using  $\beta$ -actin for normalization. Paracellular permeability measurements for FD4 were carried out in the Ussing chamber. Water flux measurements were performed in a modified Ussing chamber with water flux induced by different osmotic gradients.

|                                                                                |                               | Control 14                | Control 18                | KO 18                                       | KO 36                                       |
|--------------------------------------------------------------------------------|-------------------------------|---------------------------|---------------------------|---------------------------------------------|---------------------------------------------|
| Angulin-1 expression (%)                                                       |                               | 99.2 $\pm$ 4.8<br>(n=9)   | 100.8 $\pm$ 5.1<br>(n=9)  | 0.10 $\pm$ 0.02 *** <sup>##</sup><br>(n=9)  | 0.05 $\pm$ 0.01 *** <sup>##</sup><br>(n=9)  |
| TER (k $\Omega$ ·cm <sup>2</sup> )                                             |                               | 7.3 $\pm$ 0.2<br>(n=60)   | 7.4 $\pm$ 0.1<br>(n=60)   | 0.96 $\pm$ 0.02 *** <sup>##</sup><br>(n=60) | 0.53 $\pm$ 0.01 *** <sup>##</sup><br>(n=60) |
| P <sub>FD4</sub> ( $\times 10^{-9}$ cm·s <sup>-1</sup> )                       |                               | 44.8 $\pm$ 8.3<br>(n=8)   | 70.4 $\pm$ 21.7<br>(n=8)  | 144.4 $\pm$ 33.6 *<br>(n=8)                 | 76.6 $\pm$ 5.5<br>(n=9)                     |
| Osmotic gradient                                                               |                               |                           |                           |                                             |                                             |
| P <sub>FD4</sub> ( $\times 10^{-9}$ cm·s <sup>-1</sup> )                       |                               | 52.4 $\pm$ 17.2<br>(n=10) | 58.4 $\pm$ 14.1<br>(n=12) | 79.3 $\pm$ 22.7<br>(n=10)                   | 56.5 $\pm$ 12.8<br>(n=10)                   |
| Isosmotic                                                                      |                               |                           |                           |                                             |                                             |
| P <sub>D4</sub> ( $\times 10^{-10}$ cm·s <sup>-1</sup> )                       |                               | 2.41 $\pm$ 0.45<br>(n=8)  | 3.79 $\pm$ 1.17<br>(n=8)  | 7.76 $\pm$ 1.81 *<br>(n=8)                  | 4.12 $\pm$ 0.30<br>(n=9)                    |
| Osmotic gradient                                                               |                               |                           |                           |                                             |                                             |
| P <sub>D4</sub> ( $\times 10^{-10}$ cm·s <sup>-1</sup> )                       |                               | 2.82 $\pm$ 0.93<br>(n=10) | 3.14 $\pm$ 0.76<br>(n=12) | 4.26 $\pm$ 1.22<br>(n=10)                   | 3.12 $\pm$ 0.63<br>(n=11)                   |
| Isosmotic                                                                      |                               |                           |                           |                                             |                                             |
| Water flux – Apical side<br>( $\mu$ l·h <sup>-1</sup> ·cm <sup>-2</sup> )      | 100 mM mannitol<br>(100 mOsm) | 2.20 $\pm$ 0.40<br>(n=7)  | 2.32 $\pm$ 0.30<br>(n=7)  | 2.92 $\pm$ 0.34<br>(n=8)                    | 2.92 $\pm$ 0.56<br>(n=8)                    |
| Water flux – Basolateral side<br>( $\mu$ l·h <sup>-1</sup> ·cm <sup>-2</sup> ) | 100 mM mannitol<br>(100 mOsm) | -2.27 $\pm$ 0.54<br>(n=8) | -1.90 $\pm$ 0.28<br>(n=6) | -2.07 $\pm$ 0.55<br>(n=8)                   | -2.62 $\pm$ 0.44<br>(n=8)                   |

Significances refer to respective controls. *n* number of experiments, \* *p*  $\leq$  0.05, \*\* *p*  $\leq$  0.01, \*\*\* *p*  $\leq$  0.001 with regard to control 14 and # *p*  $\leq$  0.05, ## *p*  $\leq$  0.01, ### *p*  $\leq$  0.001 with regard to control 18.

**Table S2.** Characteristics of HT-29/B6 angulin-1 knockout clones and the corresponding controls. Two angulin-1 knockout clones (KO 12 and KO 32) and their corresponding controls (Control 15, Control 29) were analyzed in this study. Data of angulin-1 expression have been obtained by densitometric analysis of Western blots using  $\beta$ -actin for normalization. Paracellular permeability measurements for FD4 were carried out in the Ussing chamber. Water flux measurements were performed in a modified Ussing chamber with water flux induced by different osmotic gradients.

|                                                                                 |                               | Control 15                | Control 29                | KO 12                                       | KO 32                                       |
|---------------------------------------------------------------------------------|-------------------------------|---------------------------|---------------------------|---------------------------------------------|---------------------------------------------|
| Angulin-1 expression (%)                                                        |                               | 94.3 $\pm$ 3.8<br>(n=9)   | 105.7 $\pm$ 5.4<br>(n=9)  | 3.2 $\pm$ 0.6 *** <sup>##</sup><br>(n=9)    | 0.2 $\pm$ 0.1 *** <sup>##</sup><br>(n=9)    |
| TER (k $\Omega$ ·cm <sup>2</sup> )                                              |                               | 1.06 $\pm$ 0.02<br>(n=43) | 1.75 $\pm$ 0.08<br>(n=43) | 0.57 $\pm$ 0.03 *** <sup>##</sup><br>(n=43) | 0.28 $\pm$ 0.01 *** <sup>##</sup><br>(n=43) |
| P <sub>FD4</sub> ( $\times 10^{-9}$ cm·s <sup>-1</sup> )                        |                               | 26.7 $\pm$ 4.4<br>(n=6)   | 15.7 $\pm$ 2.0<br>(n=6)   | 33.1 $\pm$ 3.6<br>(n=6)                     | 54.0 $\pm$ 7.5 ** <sup>##</sup><br>(n=6)    |
| Osmotic gradient                                                                |                               |                           |                           |                                             |                                             |
| P <sub>FD4</sub> ( $\times 10^{-9}$ cm·s <sup>-1</sup> )                        |                               | 41.2 $\pm$ 5.1<br>(n=9)   | 14.1 $\pm$ 1.8<br>(n=9)   | 82.7 $\pm$ 8.0 *** <sup>##</sup><br>(n=9)   | 133.6 $\pm$ 7.0 *** <sup>##</sup><br>(n=9)  |
| Isosmotic                                                                       |                               |                           |                           |                                             |                                             |
| P <sub>D4</sub> ( $\times 10^{-10}$ cm·s <sup>-1</sup> )                        |                               | 4.28 $\pm$ 1.12<br>(n=6)  | 2.46 $\pm$ 0.57<br>(n=6)  | 4.85 $\pm$ 0.95<br>(n=6)                    | 8.25 $\pm$ 2.00 #<br>(n=6)                  |
| Osmotic gradient                                                                |                               |                           |                           |                                             |                                             |
| P <sub>D4</sub> ( $\times 10^{-10}$ cm·s <sup>-1</sup> )                        |                               | 4.08 $\pm$ 0.50<br>(n=9)  | 1.40 $\pm$ 0.18<br>(n=9)  | 8.19 $\pm$ 0.80 *** <sup>##</sup><br>(n=9)  | 13.23 $\pm$ 0.69 *** <sup>##</sup><br>(n=9) |
| Isosmotic                                                                       |                               |                           |                           |                                             |                                             |
| Water flux<br>Apical side<br>( $\mu$ l·h <sup>-1</sup> ·cm <sup>-2</sup> )      | 100 mM mannitol<br>(100 mOsm) | 14.1 $\pm$ 0.6<br>(n=8)   | 13.8 $\pm$ 0.6<br>(n=8)   | 13.9 $\pm$ 0.5<br>(n=8)                     | 13.1 $\pm$ 0.7<br>(n=8)                     |
| Water flux<br>Basolateral side<br>( $\mu$ l·h <sup>-1</sup> ·cm <sup>-2</sup> ) | 100 mM mannitol<br>(100 mOsm) | -15.0 $\pm$ 0.7<br>(n=8)  | -15.4 $\pm$ 0.5<br>(n=8)  | -14.4 $\pm$ 0.7<br>(n=8)                    | -13.2 $\pm$ 0.9<br>(n=8)                    |

Significances refer to respective controls. *n* number of experiments, \* *p*  $\leq$  0.05, \*\* *p*  $\leq$  0.01, \*\*\* *p*  $\leq$  0.001 with regard to control 15 and # *p*  $\leq$  0.05, ## *p*  $\leq$  0.01, ### *p*  $\leq$  0.001 with regard to control 29.



**Table S3.** Barrier function and water permeability in the experimental cell models used in this work modulating tricellular tight junction proteins.

| TJ protein  | Method                     | Cell type    | Observed changes in barrier function and water permeability                                                                                                   |
|-------------|----------------------------|--------------|---------------------------------------------------------------------------------------------------------------------------------------------------------------|
| Tricellulin | Knockdown - shRNA          | MDCK C7 [21] | TER:<br>KD 23 and KD 24 → Reduced                                                                                                                             |
|             |                            |              | Charge selectivity:<br>KD 23 and KD 24 → Unchanged                                                                                                            |
|             |                            |              | 4-kDa FITC-dextran flux:<br>KD 23 → Unchanged<br>KD 24 → Increased                                                                                            |
|             |                            |              | Upregulated proteins:<br>KD 23 → Claudin-1 and AQP-7                                                                                                          |
|             |                            |              | Downregulated proteins:<br>KD 24 → Occludin, claudin-4 and -8                                                                                                 |
|             |                            |              | <b>Transepithelial water permeability:</b><br>KD 23 and KD 24 → Increased                                                                                     |
|             |                            | HT-29/B6     | TER:<br>KD 11 and KD 17 → Reduced                                                                                                                             |
|             |                            |              | Charge selectivity:<br>KD 11 and KD 17 → Unchanged                                                                                                            |
|             |                            | HT-29/B6     | 4-kDa FITC-dextran flux:<br>KD 11 → Increased<br>KD 17 → Increased                                                                                            |
|             |                            |              | Upregulated proteins:<br>KD 11 → Angulin-1, claudin-1, -2 and -8<br>KD 17 → Angulin-1, claudin-2, -3 and -8, AQP-4                                            |
|             |                            |              | Downregulated proteins:<br>KD 17 → AQP-3                                                                                                                      |
|             |                            |              | <b>Transepithelial water permeability:</b><br>KD 11 and KD 17 → Unchanged                                                                                     |
| Angulin-1   | Knockout - CRISPR/Cas9/HDR | MDCK C7      | TER:<br>KO 18 and KO 36 → Reduced                                                                                                                             |
|             |                            |              | 4-kDa FITC-dextran flux:<br>KO 18 → Increased<br>KO 36 → Unchanged                                                                                            |
|             |                            |              | bTJ ultrastructure:<br>KO 18 and KO 36 → Unchanged                                                                                                            |
|             |                            |              | Upregulated proteins:<br>KO 18 → AQP-1                                                                                                                        |
|             |                            |              | Downregulated proteins:<br>KO 18 → Occludin, claudin-1, -5, -7<br>KO 36 → Occludin, claudin-1, -3, -4, -5, -7, -8, AQP-7                                      |
|             |                            |              | <b>Transepithelial water permeability:</b><br>KO 18 and KO 36 → Increased                                                                                     |
|             |                            | HT-29/B6     | TER:<br>KO 12 and KO 32 → Reduced                                                                                                                             |
|             |                            |              | 4-kDa FITC-dextran flux:<br>KO 12 → Increased<br>KO 32 → Increased                                                                                            |
|             |                            | HT-29/B6     | bTJ ultrastructure:<br>KO 12 and KO 32 → Unchanged                                                                                                            |
|             |                            |              | Upregulated proteins:<br>KO 12 → Tricellulin, claudin-1, -5, -7 and -8, and LI-cadherin<br>KO 32 → Tricellulin, claudin-1, -3, -5, -7 and -8, and LI-cadherin |
|             |                            |              | Downregulated proteins:<br>KO 12 → Claudin-2, AQP-4 and SGLT1                                                                                                 |
|             |                            |              | <b>Transepithelial water permeability:</b><br>KO 12 and KO 32 → Unchanged                                                                                     |



**Part 2.** Characterization of tricellulin KD clones in the HT-29/B6 cell line.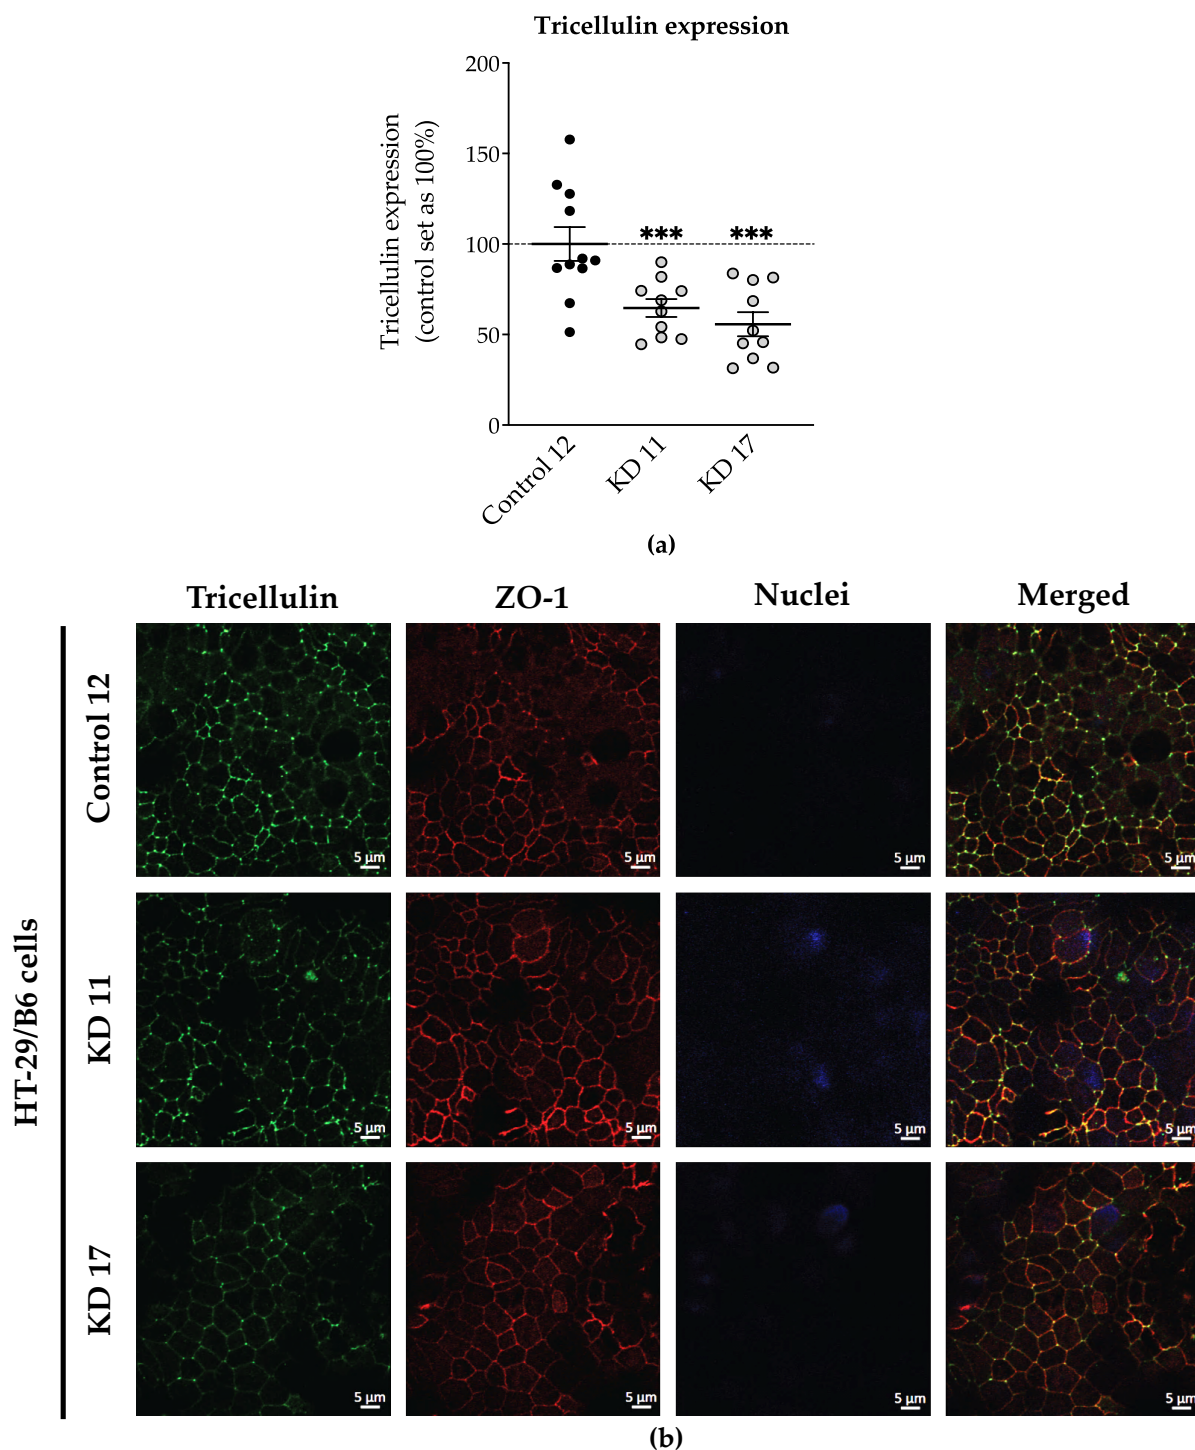

**Figure S1.** Expression and localization of tricellulin in HT-29/B6 cells. **(a)** Densitometric analysis of tricellulin protein expression levels in stable shTRIC transfectants in comparison to vector-transfected controls. shTRIC leads to decreased tricellulin expression (\*\* $p \leq 0.001$ ) and **(b)** Immunofluorescent staining of HT-29/B6 shRNA targeting tricellulin. Knockdown in HT-29/B6 cells had no effect on localization of tricellulin, which remained within the tTJ. Tricellulin: green, ZO-1: red, DAPI (nucleus): blue.



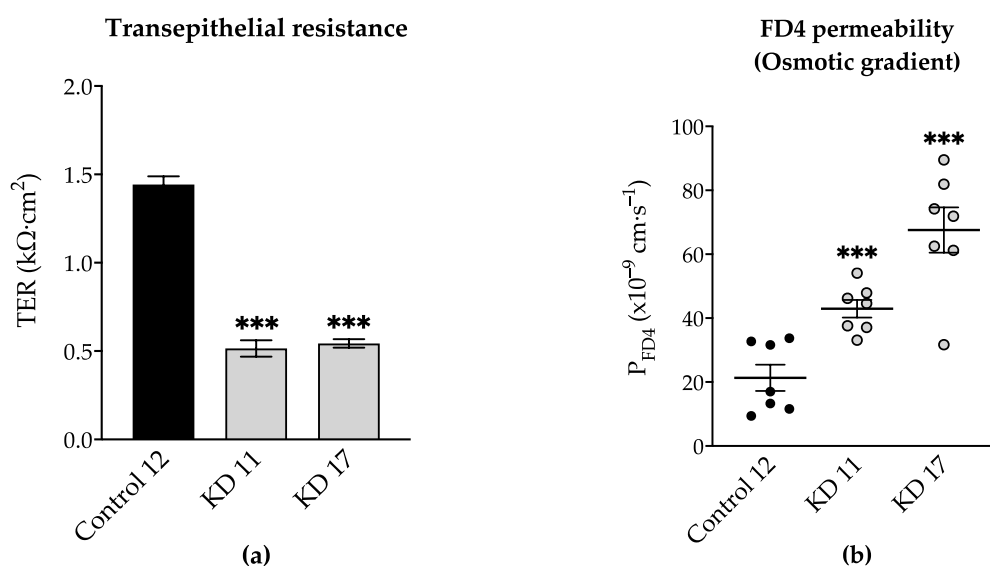

**Figure S2.** Functional analysis of tricellulin knockdown in HT-29/B6 cells. **(a)** Effect of tricellulin knockdown on transepithelial resistance. Tricellulin KD decreased TER in HT-29/B6 cells ( $n=24$ ; \*\*\*  $p \leq 0.001$ ). **(b)** Permeability to 4-kDa FITC-dextran in control cells and tricellulin knockdown clones. Tricellulin knockdown increased the permeability to 4-kDa FITC-dextran under an osmotic condition ( $n=7$ , \*\*\*  $p \leq 0.001$ ).



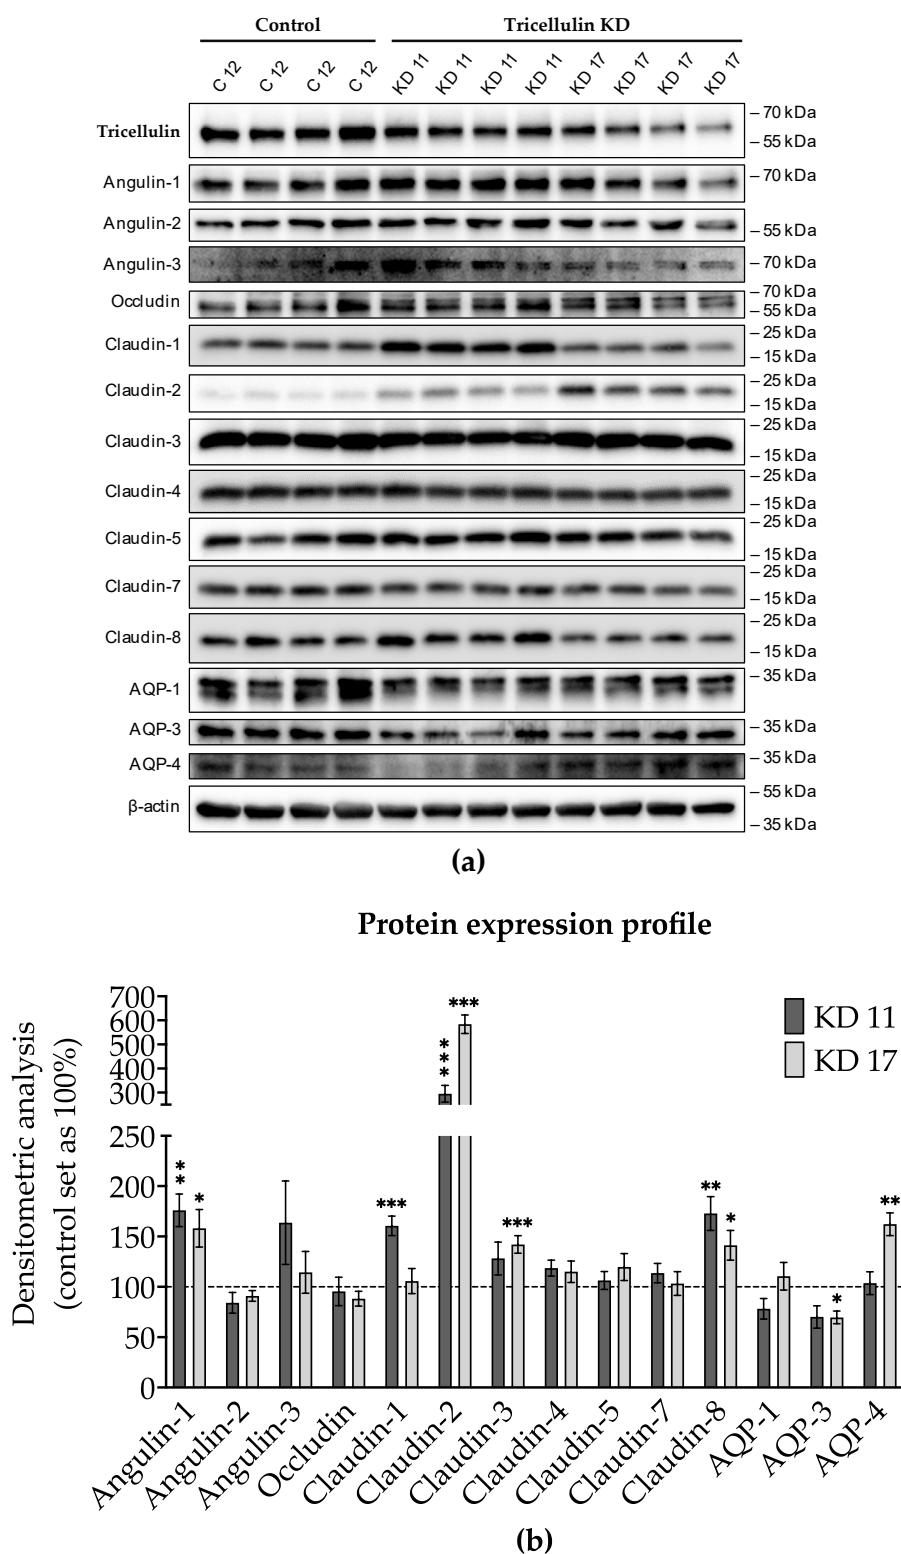

**Figure S3.** Angulin, occludin, claudin and AQP expression in control and tricellulin knockdown HT-29/B6 cells. **(a)** Representative Western blots. **(b)** Densitometric analysis of protein expression levels in stable shTRIC transfectants in comparison to the vector-transfected control.  $\beta$ -actin was used as an internal control for normalization to protein content. ( $n=4-14$ ,  $N=4$ , \*  $p \leq 0.05$ , \*\*  $p \leq 0.01$ , \*\*\*  $p \leq 0.001$ ).



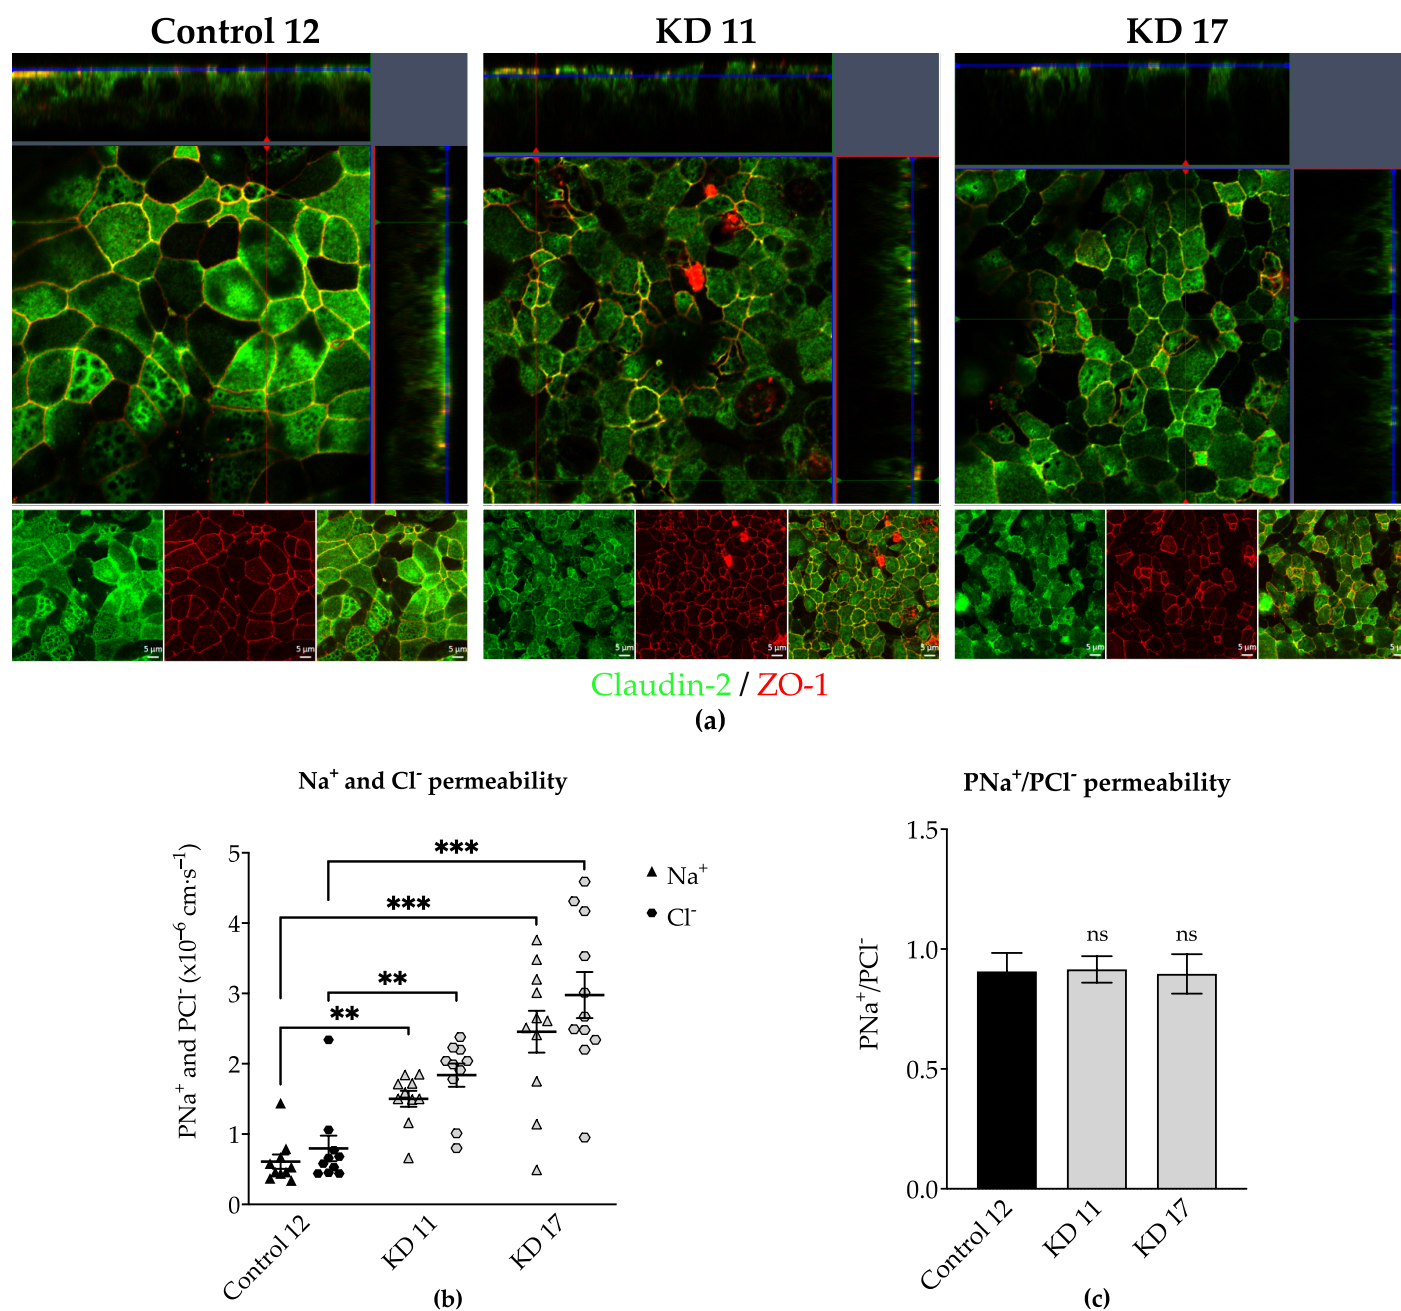

**Figure S4.** Functional analysis of tricellulin knockdown HT-29/B6 cells. **(a)** Localization of claudin-2 in tricellulin knockdown clones. Claudin-2 localizes at the apical membrane, subjunctional membrane and cytoplasm without differences between the knockdown clones and their control (claudin-2: green; ZO-1: red). **(b-c)** Effect of upregulation of claudin-2 on permeability for Na<sup>+</sup> and Cl<sup>-</sup> ions. **(b)** Na<sup>+</sup> and Cl<sup>-</sup> permeability is increased in both KD clones without any change in selectivity ( $n=11$ , \*\*  $p \leq 0.01$ , \*\*\*  $p \leq 0.001$ ) and **(c)** Ratio Na<sup>+</sup> over Cl<sup>-</sup> permeability did not change in KD clones compared with the control ( $n=11$ , ns: not significant). The upregulated claudin-2 is non-functional and did not change the cation selectivity of TJ in HT-29/B6 cells.
